# Supplementary material
Source: PubMed Central journal article supplement (PMC6714004)
Supplement: jamapediatr-173-979-s001.pdf [file jamapediatr-173-979-s001.pdf]

## Supplementary Online Content

Adelman JS, Applebaum JR, Southern WN, et al. Risk of wrong-patient orders among multiple vs singleton births in the neonatal intensive care units of 2 integrated health care systems. *JAMA Pediatr*. Published August 26, 2019.  
doi:10.1001/jamapediatrics.2019.2733

**eTable 1.** Participant Characteristics by Study Site

**eTable 2.** Wrong-Patient Orders Among Multiple-Birth Versus Singleton-Birth Infants by Study Site

This supplementary material has been provided by the authors to give readers additional information about their work.

**eTable 1. Participant Characteristics by Study Site<sup>a</sup>**

|                         | Site 1              |                       |                      | Site 2              |                       |                     |
|-------------------------|---------------------|-----------------------|----------------------|---------------------|-----------------------|---------------------|
|                         | Overall<br>(n=8629) | Singleton<br>(n=7268) | Multiple<br>(n=1361) | Overall<br>(n=2190) | Singleton<br>(n=1982) | Multiple<br>(n=208) |
| <b>Sex</b>              |                     |                       |                      |                     |                       |                     |
| Male                    | 4873 (56.5)         | 4186 (57.6)           | 687 (50.5)           | 1162 (53.1)         | 1057 (53.3)           | 105 (50.5)          |
| Female                  | 3756 (43.5)         | 3082 (42.4)           | 674 (49.5)           | 1028 (46.9)         | 925 (46.7)            | 103 (49.5)          |
| <b>Race/ethnicity</b>   |                     |                       |                      |                     |                       |                     |
| White                   | 2493 (28.9)         | 1960 (27.0)           | 533 (39.2)           | 209 (9.5)           | 180 (9.1)             | 29 (13.9)           |
| Hispanic                | 1103 (12.8)         | 983 (13.5)            | 120 (8.8)            | 456 (20.8)          | 421 (21.2)            | 35 (16.8)           |
| Black                   | 593 (6.9)           | 523 (7.2)             | 70 (5.1)             | 684 (31.2)          | 611 (30.8)            | 73 (35.1)           |
| Other/unknown           | 4440 (51.5)         | 3802 (52.3)           | 638 (46.9)           | 841 (38.4)          | 770 (38.9)            | 71 (34.1)           |
| <b>Health insurance</b> |                     |                       |                      |                     |                       |                     |
| Commercial              | 5459 (63.3)         | 4371 (60.1)           | 1088 (79.9)          | 513 (23.4)          | 454 (22.9)            | 59 (28.4)           |
| Medicaid                | 3101 (35.9)         | 2830 (38.9)           | 271 (19.9)           | 1671 (76.3)         | 1522 (76.8)           | 149 (71.6)          |
| Self-pay                | 69 (0.8)            | 67 (0.9)              | 2 (0.2)              | 6 (0.3)             | 6 (0.3)               | 0 (0)               |

<sup>a</sup> Comparisons between singleton and multiple birth infants for sex, race/ethnicity, and health insurance status. Site 1:  $P < .0005$ , all comparisons; Site 2: sex,  $P = .43$ ; race,  $P = .04$ ; insurance,  $P = .16$ .

**eTable 2. Wrong-Patient Orders Among Multiple-Birth Versus Singleton-Birth Infants by Study Site**

|                  | Total Orders    | No. of RAR Events | RAR Events per 100,000 orders | Unadjusted Odds Ratio (95% CI)  | Adjusted <sup>a,b</sup> Odds Ratio (95% CI) |
|------------------|-----------------|-------------------|-------------------------------|---------------------------------|---------------------------------------------|
| <b>Site 1</b>    |                 |                   |                               |                                 |                                             |
| Overall          | 1,251,132       | 586               | 46.8                          | NA                              | NA                                          |
| Singleton births | 974,022         | 405               | 41.6                          | 1.00 (Ref)                      | 1.00 (Ref)                                  |
| Multiple births  | 277,110         | 181               | 65.3                          | 1.72 (1.35–2.20) <sup>c,e</sup> | 1.74 (1.36–2.23) <sup>c,f</sup>             |
| Extrafamilial    | NA <sup>g</sup> | 100               | 36.1                          | NA                              | NA                                          |
| Intrafamilial    | NA <sup>g</sup> | 81                | 29.2                          | NA                              | NA                                          |
| <b>Site 2</b>    |                 |                   |                               |                                 |                                             |
| Overall          | 285,028         | 130               | 45.6                          | NA                              | NA                                          |
| Singleton births | 251,610         | 106               | 42.1                          | 1.00 (Ref)                      | 1.00 (Ref)                                  |
| Multiple births  | 33,418          | 24                | 71.8                          | 1.83 (1.01–3.29) <sup>d,e</sup> | 1.84 (1.02–3.31) <sup>d,f</sup>             |
| Extrafamilial    | NA <sup>g</sup> | 12                | 35.9                          | NA                              | NA                                          |
| Intrafamilial    | NA <sup>g</sup> | 12                | 35.9                          | NA                              | NA                                          |

Abbreviations: CI, confidence interval; RAR events, Retract-and-Reorder events. Wrong-Patient RAR events are orders placed for a patient that are retracted (ie, cancelled) by the same clinician within 10 minutes, then reordered by the same clinician for a different patient within the next 10 minutes.

<sup>a</sup> Logistic regression models constructed to calculate odds ratios and 95% confidence intervals.

<sup>b</sup> Adjusted for sex, race/ethnicity, and health insurance status.

<sup>c</sup>  $P < .001$ , comparison of multiple vs singleton births.

<sup>d</sup>  $P < .05$ , comparison of multiple vs singleton births.

<sup>e</sup> Ratio of odds ratios (ROR) 0.94; 95% CI 0.50 to 1.78;  $P = .89$ , unadjusted comparison of site 1 vs site 2.

<sup>f</sup> Ratio of odds ratios (ROR) 0.95; 95% CI 0.50 to 1.80;  $P = .89$ , adjusted comparison of site 1 vs site 2.

<sup>g</sup> The total number of orders for multiple birth infants was used as the denominator to calculate the rate of extrafamilial and intrafamilial RAR events.
